# Supplementary material for: The Role of Chemotherapy in Management of Inoperable, Metastatic and/or Recurrent Melanotic Neuroectodermal Tumor of Infancy—Own Experience and Systematic Review
Source: MDPI journal article supplement (doi:10.3390/cancers13153872), 2021-07-31
Supplement: s1 [file s1]

Table S1. Detailed data of the patients treated with chemotherapy in the first-line treatment of MNT1.

## PATIENTS TREATED WITH ADJUVANT CHT

| patient's no. | author, year of study     | patient's age at diagnosis [months], sex | primary tumor site and size [cm]        | metastases at diagnosis                                                                          | initial management (before adjuvant CHT)             | adjuvant CHT (cytostatic drugs, duration)                                                                                                                 | response to CHT   | further course of treatment | follow-up from the beginning of treatment | outcome            |
|---------------|---------------------------|------------------------------------------|-----------------------------------------|--------------------------------------------------------------------------------------------------|------------------------------------------------------|-----------------------------------------------------------------------------------------------------------------------------------------------------------|-------------------|-----------------------------|-------------------------------------------|--------------------|
| 1.            | Cohen 1988 [1]            | 4, ND                                    | CNS, ND                                 | ND                                                                                               | R2 resection                                         | <b>vincristine, lomustine, methylprednisolone, procarbazine, hydroxyurea, cisplatin, cytosine arabinoside, cyclophosphamide<sup>i</sup></b><br>12 months  | stable disease    | progression → RTX           | 26 months                                 | alive with disease |
| 2.            | De Chiara 1992 [2]        | 17, M                                    | epididymis 2.3x0.9                      | yes, LN                                                                                          | complete resection → LN resection                    | <b>cyclophosphamide, doxorubicin, cisplatin, etoposide<sup>ii</sup></b><br>18 months                                                                      | no recurrence     | -                           | 28 months                                 | NED                |
| 3.            | Hoshino 1994 [3]          | 5, M                                     | skull 4x4                               | no                                                                                               | R2 resection → R2 resection                          | <b>vincristine, lomustine, methylprednisolone, procarbazine, hydroxyurea, cisplatin, cytosine arabinoside, cyclophosphamide<sup>iii</sup></b><br>3 months | complete response | -                           | ≈ 10 months                               | NED                |
| 4.            | Patankar 1998 [4]         | 9, ND                                    | skull ND                                | ND                                                                                               | biopsy → R2 resection                                | <b>cyclophosphamide, doxorubicin<sup>iv</sup></b><br>4 months                                                                                             | complete response | -                           | ≈ 23 months                               | NED                |
| 5.            | Kumari 2005 [5]           | 4, M                                     | skull 9.2x7.8                           | ND                                                                                               | R2 resection                                         | <b>vincristine, cyclophosphamide<sup>v</sup></b><br>6 months                                                                                              | partial response  | R0 resection                | 16 months                                 | NED                |
| 6.            | Yoo 2014 [6]              | 28, F                                    | CNS, ND                                 | yes, spinal canal, inguinal sac peritoneum, cardiophrenic region (disseminated through VP shunt) | R2 resection of the inguinal mass                    | <b>ifosfamide, doxorubicin, vincristine<sup>vi</sup></b><br>1,5 months                                                                                    | partial response  | progression                 | 5 months                                  | DOD                |
| 7.            | Higashi 2016 [7]          | 3, F                                     | maxilla, ND                             | ND                                                                                               | biopsy -> R1 resection                               | <b>vincristine, cyclophosphamide, pirarubicin, cyclophosphamide, carboplatin<sup>vii</sup></b><br>≈ 5 months                                              | no recurrence     | -                           | ≈ 3 years                                 | NED                |
| 8.            | Murphy 2016 [8]           | 3, M                                     | maxilla 3.5x2x1                         | no                                                                                               | biopsy → R1 resection → R1 resection                 | <b>vincristine, cyclophosphamide<sup>viii</sup></b><br>2,5 months                                                                                         | no recurrence     | -                           | 3 years                                   | NED                |
| 9.            | Azari 2016 [9]            | 6, M                                     | mandible 9.4x6.7x6                      | yes, cervical LN                                                                                 | biopsy → R0 resection                                | <b>ifosfamide, vincristine, doxorubicin/dactinomycin<sup>ix</sup></b><br>7 months                                                                         | no recurrence     | -                           | 4,5 years                                 | NED                |
| 10.           | current study, patient 3* | 3, F                                     | suboccipital area, spinal canal 4x4x3.1 | no                                                                                               | biopsy → 2 courses of neoadjuvant CHT → R2 resection | <b>cisplatin, etoposide, vindesine, vincristine, dacarbazine, ifosfamide<sup>x</sup></b><br>2 months                                                      | stable disease    | progression after 3 years   | 4,5 years                                 | alive with disease |

### PATIENTS TREATED WITH NEOADJUVANT CHT

| patient's no. | author, year of study     | patient's age at diagnosis [mo], sex | primary tumor site and size [cm]        | metastases at diagnosis | initial management (before neoadjuvant CHT) | neoadjuvant CHT (cytostatic drugs, duration)                                                                     | response to CHT                                | further course of treatment                                                                                                                        | follow-up from the beginning of treatment | outcome                       |
|---------------|---------------------------|--------------------------------------|-----------------------------------------|-------------------------|---------------------------------------------|------------------------------------------------------------------------------------------------------------------|------------------------------------------------|----------------------------------------------------------------------------------------------------------------------------------------------------|-------------------------------------------|-------------------------------|
| 11.           | Pierre-Kahn 1992 [10]     | 2, F                                 | skull 10x6                              | ND                      | biopsy                                      | <b>cyclophosphamide, doxorubicin</b>                                                                             | stable disease                                 | R0 resection                                                                                                                                       | 7 years                                   | NED                           |
| 12.           | Mello 2000 [11]           | 6, F                                 | maxilla 6                               | ND                      | biopsy                                      | <b>vincristine, cyclophosphamide, doxorubicin, vincristine, cisplatin, tenoposide<sup>xi</sup></b><br>2,5 months | partial response                               | R0/R1 resection                                                                                                                                    | ≈ 22 months                               | NED                           |
| 13.           | Kumari 2005 [5]           | 4, F                                 | skull 20.5x18.5                         | no                      | biopsy                                      | <b>vincristine, doxorubicin, cyclophosphamide<sup>xii</sup></b><br>12 months                                     | partial response                               | R0 resection                                                                                                                                       | 20 months                                 | recurrence, lost to follow-up |
| 14.           | Hered 2007 [12]           | 6, M                                 | orbit ND                                | ND                      | biopsy                                      | <b>vincristine, etoposide, ifosfamide<sup>xiii</sup></b><br>5 months                                             | partial response                               | R2 resection                                                                                                                                       | 3,5 years                                 | NED                           |
| 15.           | Choi 2007 [13]            | 5, M                                 | femur 5x3.8x2,5                         | no                      | biopsy                                      | <b>vincristine, doxorubicin, cyclophosphamide<sup>xiv</sup></b><br>5 months                                      | partial response                               | resection → CHT                                                                                                                                    | 6 months                                  | D (cardiomyopathy)            |
| 16.           | Rekhi 2011 [14]           | 12, M                                | femur 6x4x3                             | no                      | biopsy                                      | <b>vincristine, doxorubicin, cyclophosphamide</b><br>2 months                                                    | stable disease                                 | RTX → R0 resection                                                                                                                                 | ND                                        | ND                            |
| 17.           | Maroun 2016 [15]          | 4, F                                 | mandible 6.9x4.4x3.3                    | ND                      | biopsy                                      | <b>vincristine, dactinomycin, cyclophosphamide<sup>xv</sup></b><br>2,5 months                                    | partial response                               | R0 resection                                                                                                                                       | >2 years                                  | NED                           |
| 18.           | Creytens 2017 [16]        | 3, M                                 | forearm 3                               | no                      | biopsy                                      | <b>ifosfamide, vincristine, dactinomycin, doxorubicin<sup>xvi</sup></b><br>4 months                              | partial response                               | R0 resection                                                                                                                                       | 28 months                                 | NED                           |
| 19.           | Moreau (a) 2018 [17]      | inborn, M                            | maxilla 4.7x4                           | no                      | biopsy                                      | <b>cyclophosphamide, vincristine, etoposide, carboplatin, doxorubicin<sup>xvii</sup></b><br>3 months             | progression → stable disease after last course | R2 resection                                                                                                                                       | >2,5 years                                | NED                           |
| 20.           | Khemiri 2018 [18]         | 7, M                                 | mandible 8x4                            | ND                      | biopsy                                      | <b>ifosfamide, etoposide<sup>xviii</sup></b><br>≈ 5 months                                                       | partial response                               | resection                                                                                                                                          | ND                                        | ND                            |
| 21.           | Nicosia 2017 [19]         | 48, M                                | skull ND                                | yes, cervical LN        | LN biopsy                                   | <b>topotecan, cyclophosphamide, etoposide, ifosfamide, etoposide<sup>xix</sup></b><br>5 months                   | partial response                               | lymphadenectomy after 3 CHT courses, R2 resection after 5 CHT courses → another R2 resection → CHT + RTX → parents refused treatment → progression | ≈ 1 year                                  | DOD                           |
| 22.           | current study, patient 3* | 3, F                                 | suboccipital area, spinal canal 4x4x3.1 | no                      | biopsy                                      | <b>vincristine, cyclophosphamide, doxorubicin<sup>xx</sup></b><br>1 month                                        | stable disease                                 | R2 resection → CHT → progression after 3 years                                                                                                     | 4,5 years                                 | alive with disease            |

| patient's no.                                                                                                                                                                                                                                                                                                                                                                                                                                                                                                                                               | author, year of study | patient's age at diagnosis [mo], sex | primary tumor site and size [cm] | metastases at diagnosis | initial management | CHT (cytostatic drugs, duration)                                                                                                                                                             | response to CHT                                                                    | further course of treatment     | follow-up from the beginning of treatment | outcome                   |
|-------------------------------------------------------------------------------------------------------------------------------------------------------------------------------------------------------------------------------------------------------------------------------------------------------------------------------------------------------------------------------------------------------------------------------------------------------------------------------------------------------------------------------------------------------------|-----------------------|--------------------------------------|----------------------------------|-------------------------|--------------------|----------------------------------------------------------------------------------------------------------------------------------------------------------------------------------------------|------------------------------------------------------------------------------------|---------------------------------|-------------------------------------------|---------------------------|
| 23.                                                                                                                                                                                                                                                                                                                                                                                                                                                                                                                                                         | Woessmann 2003 [20]   | 2, M                                 | maxilla ND                       | ND                      | biopsy             | <b>vincristine, ifosfamide, dactinomycin</b><br>→<br><b>vinblastin, ifosfamide/cyclophosphamide, etoposide, doxorubicin/liposomal daunorubicin, dactinomycin</b> <sup>xxi</sup><br>10 months | first regimen<br>→ progression<br>second regimen<br>→ subtotal tumor calcification | -                               | 22 months                                 | alive with stable disease |
| 24.                                                                                                                                                                                                                                                                                                                                                                                                                                                                                                                                                         | Sailukar 2007 [21]    | 3, M                                 | maxilla 8x6                      | ND                      | biopsy             | <b>vincristine, cyclophosphamide, dactinomycin</b> <sup>xxii</sup>                                                                                                                           | stable disease                                                                     | parents refused local treatment | ND                                        | ND                        |
| 25.                                                                                                                                                                                                                                                                                                                                                                                                                                                                                                                                                         | Moreau (b) 2018 [22]  | 4, ND                                | mandible 5.5                     | no                      | biopsy             | <b>etoposide, carboplatin</b>                                                                                                                                                                | partial response                                                                   | -                               | 16 months                                 | alive with stable disease |
| CHT = chemotherapy; CNS = central nervous system; D = died; DOD = died of disease; F = female; HSCT = hematopoietic stem cell transplantation; LN = lymph nodes; M = male; ND = no data; NED = no evidence of disease; R0 = macroscopically complete resection with microscopically negative margins; R1 = macroscopically complete resection with microscopically positive margins; R2 = macroscopically incomplete resection; RTX = radiotherapy<br>* = patients who underwent different types of CHT and have been included in the tables more than once |                       |                                      |                                  |                         |                    |                                                                                                                                                                                              |                                                                                    |                                 |                                           |                           |

<sup>i</sup> **vincristine** (1,5mg/m2), **lomustine** (15mg/m2), **methylprednisolone** (300mg/m2 x3), **procarbazine** (75mg/m2), **hydroxyurea** (1500mg/m2), **cisplatin** (60mg/m2), **cytosine arabinoside** (300mg/m2), **cyclophosphamide** (300mg/m2) every 4-6 weeks

<sup>ii</sup> alternating courses

<sup>iii</sup> 2 courses

<sup>iv</sup> „alternate courses” every 21 days

<sup>v</sup> **vincristine** (0.05 mg/kg), **cyclophosphamide** (750 mg/m2 initially started in dose and then slowly increased), 8 courses every 3 weeks,

<sup>vi</sup> 2 courses

<sup>vii</sup> 1 course of **vincristine** (1.5 mg/m2), **cyclophosphamide** (600 mg/m2) and **pirarubicin** (30 mg/m2) followed by 5 courses of **vincristine** (1.5 mg/m2) , **cyclophosphamide** (900 mg/m2) and **carboplatin** (450 mg/m2)

<sup>viii</sup> weekly **vincristine** until week 6 and then 3 x weekly **vincristine** and 3 x weekly **cyclophosphamide** courses

<sup>ix</sup> alternating **doxorubicin/dactinomycin**, 9 courses

<sup>x</sup> 2 courses of **cisplatin, etoposide, vindesine** and 1 course of **vincristine, dacarbazine, ifosfamide**; details in case description

<sup>xi</sup> **vincristine** (day 1; 0.7 mg/m2), **cyclophosphamide** (days 1-7; 75 mg/m2), **doxorubicin** (day 8; 18 mg/m2), **vincristine** (day 8; 0.7 mg/m2), **cisplatin** (day 15; 40 mg/m2), **tenoposide** (day 17; 125 mg/m2), 3 courses

<sup>xii</sup> **vincristine** (0.05 mg/kg), **doxorubicin** (40 mg/m2 initially started in dose and then slowly increased), **cyclophosphamide** (750 mg/m2 initially started in dose and then slowly increased), 1 course every 3 weeks for 12 months

<sup>xiii</sup> 7 courses every 3 weeks

<sup>xiv</sup> **vincristine** (0.05 mg/kg), **doxorubicin** (40 mg/m2), **cyclophosphamide** (750 mg/m2), 6 courses every 3 weeks

<sup>xv</sup> **vincristine** (0.025 mg/kg/dose), **dactinomycin** (0.025 mg/kg/dose), **cyclophosphamide** (36 mg/kg/dose), 3 courses every 3 weeks

<sup>xvi</sup> RMS 2005 protocol (standard risk group, subgroup D); **doxorubicin** was added after patient reached 6 months of age

<sup>xvii</sup> 1 course of low-dose **cyclophosphamide** and **vincristine**, 2 courses of **etoposide** and **carboplatin**, 1 course of **cyclophosphamide, doxorubicin** and **vincristine**

---

<sup>xviii</sup> 6 courses of **ifosfamide** (100 mg/kg for 3 days) and **etoposide** (5 mg/kg for 3 days).

<sup>xix</sup> **topotecan** (days 1-5; 0.375 mg/m<sup>2</sup>) and **cyclophosphamide** (days 1-5; 125 mg/m<sup>2</sup>), alternating with **cyclophosphamide** (day 1; 4 g/m<sup>2</sup>) and **etoposide** (days 2-4; 200 mg/m<sup>2</sup>) or **ifosfamide** (days 1-3; 3 g/m<sup>2</sup>) and **etoposide** (days 1-3; 150 mg/m<sup>2</sup>), 5 courses

<sup>xx</sup> 2 courses, details in case description

<sup>xxi</sup> **vincristine, ifosfamide, dactinomycin** 2 courses → **vinblastin, ifosfamide/cyclophosphamide, etoposide, doxorubicin/liposomal daunorubicin** and **dactinomycin** 13 courses every 3 weeks

<sup>xxii</sup> 1 course

1. Cohen, B.H.; Handler, M.S.; DeVivo, D.C.; Garvin, J.H.; Hays, A.P.; Carmel, P. Central nervous system melanotic neuroectodermal tumor of infancy: Value of chemotherapy in management. *Neurology* **1988**, *38*, 163–164, doi:10.1212/wnl.38.1.163-a.
2. De Chiara, A.; Van Tornout, J.M.; Hachitanda, Y.; Ortega, J.A.; Shimada, H. Melanotic Neuroectodermal Tumor of Infancy. A Case Report of Paratesticular Primary with Lymph Node Involvement. *Am. J. Pediatr. Hematol. Oncol.* **1992**, *14*, 356–360.
3. Hoshino, S.; Takahashi, H.; Shimura, T.; Nakazawa, S.; Naito, Z.; Asano, G. Melanotic neuroectodermal tumor of infancy in the skull associated with high serum levels of catecholamine. *J. Neurosurg.* **1994**, *80*, 919–924, doi:10.3171/jns.1994.80.5.0919.
4. Patankar, T.; Prasad, S.; Goel, A.; Perumpillichira, J.; Desai, A.P. Malignant melanotic neuroectodermal tumour of infancy affecting the occipital squama. *J. Postgrad. Med.* **1998**, *44*, 73–75.
5. Kumari, T.P.; Venugopal, M.; Mathews, A.; Kusumakumary, P. Effectiveness of chemotherapy in melanotic neuroectodermal tumor of infancy. *Pediatr. Hematol. Oncol.* **2005**, *22*, 199–206, doi:10.1080/08880010590921450.
6. Yoo, I.H.; Yum, S.K.; Oh, S.-J.J.; Kim, K.-M.M.; Jeong, D.C. Melanotic neuroectodermal tumor of infancy disseminated by a ventriculoperitoneal shunt and diagnosed from the inguinal sac. *J. Pediatr. Hematol. Oncol.* **2014**, *36*, 61–64, doi:10.1097/MPH.0b013e31829dd114.
7. Higashi, K.; Ogawa, T.; Onuma, M.; Usubuchi, H.; Imai, Y.; Takata, I.; Hidaka, H.; Watanabe, M.; Sasahara, Y.; Koyama, S.; et al. Clinicopathological features of melanotic neuroectodermal tumor of infancy: Report of two cases. *Auris Nasus Larynx* **2016**, *43*, 451–454, doi:10.1016/j.anl.2015.10.010.
8. Murphy, C.; Pears, J.; Kearns, G.J. Melanotic neuroectodermal tumour of infancy: surgical and chemotherapeutic management. *Ir. J. Med. Sci.* **2016**, *185*, 753–756, doi:10.1007/s11845-015-1323-4.
9. Azari, A.; Petrisor, D.; Wright, J.; Ghali, G.E. Metastatic Melanotic Neuroectodermal Tumor of Infancy: Report of a Case and Review of the Literature. *J. Oral Maxillofac. Surg.* **2016**, *74*, 2431–2440, doi:10.1016/j.joms.2016.05.028.
10. Pierre-Kahn, A.; Cinalli, G.; Lellouch-Tubiana, A.; Villarejo, F.J.; Sainte-Rose, C.; Pfister, A.; Couly, G. Melanotic Neuroectodermal Tumor of the Skull and Meninges in Infancy. *Pediatr. Neurosurg.* **1992**, *18*, 6–15.
11. Mello, R.J.V.; Vidal, A.K.L.; Fittipaldi, H.M.; Montenegro, L.T.; Calheiros, L.M.C.; Rocha, G.I. Melanotic Neuroectodermal Tumor of Infancy: Clinicopathologic Study of a Case, with Emphasis on the Chemotherapeutic Effects. *Int. J. Surg. Pathol.* **2000**, *8*, 247–251, doi:10.1177/106689690000800316.
12. Hered, R.W.; Smithwick IV, W.; Sandler, E.; Goldstein, J.D. Orbital melanotic neuroectodermal tumor of infancy successfully treated with chemotherapy and subtotal excision. *J. AAPOS* **2007**, *11*, 504–505, doi:10.1016/j.jaapos.2007.03.010.
13. Choi, I.S.; Kook, H.; Han, D.K.; Baek, H.J.; Jung, S.T.; Lee, J.H.; Park, J.G.; Hwang, T.J. Melanotic Neuroectodermal Tumor of Infancy in the Femur: A

Case Report and Review of the Literature. *J. Pediatr. Hematol. Oncol.* **2007**, *29*, 854–857.

14. Rekhi, B.; Suryavanshi, P.; Desai, S.; Gulia, A.; Desai, S.; Juvekar, S.L.; Puri, A.; Jambhekar, N.A. Melanotic neuroectodermal tumor of infancy in thigh of an infant-a rare case report with diagnostic implications. *Skeletal Radiol.* **2011**, *40*, 1079–1084, doi:10.1007/s00256-011-1113-7.
15. Maroun, C.; Khalifeh, I.; Alam, E.; Akl, P.A.; Saab, R.; Moukarbel, R. V. Mandibular melanotic neuroectodermal tumor of infancy: a role for neoadjuvant chemotherapy. *Eur. Arch. Oto-Rhino-Laryngology* **2016**, *273*, 4629–4635, doi:10.1007/s00405-016-4066-6.
16. Creytens, D.; Ferdinande, L.; Lecoutere, E.; Van Dorpe, J. Melanotic neuroectodermal tumour of infancy presenting as an undifferentiated round cell tumour in the soft tissue of the forearm. *Pathology* **2017**, *49*, 87–90, doi:10.1016/j.pathol.2016.10.006.
17. Moreau, A.; Galmiche, L.; Belhous, K.; Franchi, G.; Couloigner, V.; Nevoux, J.; Aymard, P.A.; Picard, A.; Minard-Colin, V.; Kadlub, N. Prenatal Diagnosis of a Melanotic Neuroectodermal Tumor of Infancy (MNTI): A Case Report with a Favorable Outcome after Chemotherapy Failure and Incomplete Resection. *J. Pediatr. Hematol. Oncol.* **2018**, *40*, 320–324, doi:10.1097/MPH.0000000000000982.
18. Khemiri, S.; Feki, J.; Khanfir, A.; Abdelmoula, M.; Frikha, M. Melanotic Neuroectodermal Tumor of Infancy: Presentation of a Case Affecting the Mandible. *Acta Med. Iran.* **2019**, *57*, 143–146, doi:10.18502/acta.v57i2.1772.
19. Nicosia, G.; Spennato, P.; Aliberti, F.; Cascone, D.; Quaglietta, L.; Errico, M.E.; Muto, M.; Ionna, F.; Cinalli, G. Giant melanotic neuroectodermal tumor of infancy (melanotic progonoma) of the head and neck: report of a malignant case. *J. Neurosurg. Pediatr.* **2017**, *19*, 538–545, doi:10.3171/2016.11.peds16509.
20. Woessmann, W.; Neugebauer, M.; Gossen, R.; Blütters-Sawatzki, R.; Reiter, A. Successful chemotherapy for melanotic neuroectodermal tumor of infancy in a baby [1]. *Med. Pediatr. Oncol.* **2003**, *40*, 198–199, doi:10.1002/mpo.10135.
21. Sailukar, M.; Bhagwat, R.; Seth, T. Melanocytic neuroectodermal tumor of infancy. *J. Indian Assoc. Pediatr. Surg.* **2007**, *12*, 136–137.
22. Moreau, A.; Galmiche, L.; Minard-Colin, V.; Rachwalski, M.; Belhous, K.; Orbach, D.; Joly, A.; Picard, A.; Kadlub, N. Melanotic neuroectodermal tumor of infancy (MNTI) of the head and neck: A French multicenter study. *J. Cranio-Maxillo-Facial Surg.* **2018**, *46*, 201–206, doi:10.1016/j.jcms.2017.12.001.
