# Supplementary material for: The Role of Chemotherapy in Management of Inoperable, Metastatic and/or Recurrent Melanotic Neuroectodermal Tumor of Infancy—Own Experience and Systematic Review
Source: MDPI journal article supplement (doi:10.3390/cancers13153872), 2021-07-31
Supplement: s1 [file s1]

Table S2. Detailed data of the patients treated with chemotherapy in the recurrence of MNTI.

| PATIENTS WITH RECURRENCE TREATED WITH ADJUVANT CHT |                           |                                      |                                  |                         |                                                                                                                  |                                                                                                    |                   |                                                                        |                                       |                                    |
|----------------------------------------------------|---------------------------|--------------------------------------|----------------------------------|-------------------------|------------------------------------------------------------------------------------------------------------------|----------------------------------------------------------------------------------------------------|-------------------|------------------------------------------------------------------------|---------------------------------------|------------------------------------|
| patient's no                                       | author, year of study     | patient's age at diagnosis [mo], sex | primary tumor site and size [cm] | metastases at diagnosis | initial management (before adjuvant CHT)                                                                         | adjuvant CHT (cytostatic drugs, duration)                                                          | response to CHT   | further course of the treatment                                        | follow-up from beginning of treatment | outcome                            |
| 1.                                                 | Blank 1980 [1]            | 0,5, F                               | maxilla 3x1,5                    | ND                      | resection → 1 <sup>st</sup> recurrence → R2 resection                                                            | <b>vincristine, dactinomycin, cyclophosphamide</b>                                                 | complete response | -                                                                      | 13 months                             | NED                                |
| 2.                                                 | Shokry 1986 [2]           | 2, M                                 | maxilla 2,5                      | ND                      | resection → 1 <sup>st</sup> recurrence → resection → 2 <sup>nd</sup> recurrence → resection                      | <b>cyclophosphamide, doxorubicin<sup>i</sup></b>                                                   | progression       | progression → RTX                                                      | 16 months                             | DOD                                |
| 3.                                                 | Atkinson 1989 [3]         | 4, F                                 | skull 4x4                        | ND                      | R1 resection → 1 <sup>st</sup> recurrence → resection                                                            | <b>etoposide</b>                                                                                   | no recurrence     | -                                                                      | >1 year                               | NED                                |
| 4.                                                 | Pierre-Kahn 1992* [4]     | 13, M                                | skull ND                         | ND                      | biopsy → resection → 1 <sup>st</sup> recurrence with intracranial metastases → CHT → progression → resection     | <b>cyclophosphamide, carboplatin → cyclophosphamide, etoposide<sup>ii</sup></b>                    | progression       | progression                                                            | ND                                    | progression when lost to follow-up |
| 5.                                                 | Shaia 2002 [5]            | 2, M                                 | maxilla ND                       | ND                      | biopsy → resection → 1 <sup>st</sup> recurrence → R1 resection                                                   | <b>carboplatin, cyclophosphamide, doxorubicin, etoposide<sup>iii</sup></b><br>5 months             | no recurrence     | -                                                                      | 1 year                                | NED                                |
| 6.                                                 | Kumari 2005 [6]           | 4, M                                 | orbit 2,6x1,8                    | ND                      | resection → 1 <sup>st</sup> recurrence → R2 resection                                                            | <b>vincristine, cyclophosphamide, doxorubicin<sup>iv</sup></b><br>6 months                         | partial response  | -                                                                      | 8 months                              | alive with disease, on treatment   |
| 7.                                                 | Haque 2012 [7]            | 2, M                                 | maxilla ND                       | ND                      | resection → 1 <sup>st</sup> recurrence → R2 resection                                                            | <b>cyclophosphamide, vincristine<sup>v</sup></b><br>2 months                                       | stable disease    | -                                                                      | ND                                    | alive with stable disease          |
| 8.                                                 | Rickart 2019 [8]          | 1,5, M                               | maxilla ND                       | ND                      | curettage → curettage → 1 <sup>st</sup> recurrence → R1 resection                                                | <b>cyclophosphamide, vincristine<sup>vi</sup></b><br>1,5 months                                    | no recurrence     | -                                                                      | 17 years                              | NED                                |
| 9.                                                 | Rickart 2019 [8]          | 1, M                                 | maxilla ND                       | ND                      | curettage → 1 <sup>st</sup> recurrence → R1 resection                                                            | <b>vincristine, cisplatin, etoposide, cyclophosphamide, carboplatin<sup>vii</sup></b><br>4 months  | no recurrence     | -                                                                      | 14 years                              | NED                                |
| 10.                                                | Rickart 2019 [8]          | 6, M                                 | maxilla ND                       | ND                      | curettage → curettage → 1 <sup>st</sup> recurrence → R1 resection                                                | <b>vincristine, cisplatin, etoposide, cyclophosphamide, carboplatin<sup>viii</sup></b><br>4 months | no recurrence     | -                                                                      | >5 years                              | NED                                |
| 11.                                                | Pereira 2020 [9]          | 12, M                                | skull, 4.5x4.2x3.6               | ND                      | R1 resection → 1 <sup>st</sup> recurrence → resection → 2 <sup>nd</sup> recurrence → R2 resection → R2 resection | <b>vincristine, doxorubicin, cyclophosphamide, carboplatin<sup>ix</sup></b><br>≈ 5 months          | partial response  | CHT <sup>x</sup> → progression with leptomeningeal dissemination → RTX | ≈ 4 years                             | alive with disease                 |
| 12.                                                | current study, patient 2* | 6, F                                 | maxilla ND                       | no                      | R2 resection → 1 <sup>st</sup> recurrence → R2 resection → 2 <sup>nd</sup> recurrence → CHT → R1 resection       | <b>vincristine, dactinomycin, cyclophosphamide<sup>xi</sup></b><br>5 months                        | no recurrence     | -                                                                      | 6 years                               | ALL 7 mo after MNTI treatment      |

|                                                       |                           |                                      |                                  |                         |                                                                                                                                                                                       |                                                                                                                  |                                                             |                                                |                                       | CHT, allo-HSCT → complete response, NED                                  |
|-------------------------------------------------------|---------------------------|--------------------------------------|----------------------------------|-------------------------|---------------------------------------------------------------------------------------------------------------------------------------------------------------------------------------|------------------------------------------------------------------------------------------------------------------|-------------------------------------------------------------|------------------------------------------------|---------------------------------------|--------------------------------------------------------------------------|
| PATIENTS WITH RECURRENCE TREATED WITH NEOADJUVANT CHT |                           |                                      |                                  |                         |                                                                                                                                                                                       |                                                                                                                  |                                                             |                                                |                                       |                                                                          |
| patient's no                                          | author, year of study     | patient's age at diagnosis [mo], sex | primary tumor site and size [cm] | metastases at diagnosis | initial management (before neoadjuvant CHT)                                                                                                                                           | neoadjuvant CHT (cytostatic drugs, duration)                                                                     | response to CHT                                             | further course of the treatment                | follow-up from beginning of treatment | outcome                                                                  |
| 13.                                                   | Dehner 1979 [10]          | 4, M                                 | maxilla<br>2,5x2x1,5             | ND                      | R1 resection → R0 resection<br>→ 1 <sup>st</sup> recurrence → R1 resection<br>→ 2 <sup>nd</sup> recurrence → R1 resection<br>→ 3 <sup>rd</sup> recurrence with lymph nodes meta → RTX | cyclophosphamide, methotrexate,<br>vincristine <sup>xii</sup>                                                    | progression                                                 | -                                              | 34 months                             | DOD                                                                      |
| 14.                                                   | Pierre-Kahn 1992* [4]     | 13, M                                | skull<br>ND                      | ND                      | biopsy → resection<br>→ 1 <sup>st</sup> recurrence with intracranial metastases                                                                                                       | cyclophosphamide, carboplatin,<br>cyclophosphamide, etoposide <sup>xiii</sup>                                    | partial response (clear-up of metastases, local regression) | progression → resection<br>→ CHT → progression | ND                                    | progression when lost to follow-up                                       |
| 15.                                                   | Neven 2008 [11]           | 4, M                                 | mandible<br>3,5                  | ND                      | biopsy → resection<br>→ 1 <sup>st</sup> recurrence → R1 resection<br>→ 2 <sup>nd</sup> recurrence → resection<br>→ 3 <sup>rd</sup> recurrence                                         | vincristine, ifosfamide, carboplatin,<br>etoposide <sup>xiv</sup>                                                | complete response                                           | -                                              | 14 years                              | NED                                                                      |
| 16.                                                   | Enriquez 2011 [12]        | 2, M                                 | maxilla<br>3.8x3x2               | ND                      | resection → 1 <sup>st</sup> recurrence                                                                                                                                                | cyclophosphamide, vincristine,<br>doxorubicin <sup>xv</sup>                                                      | partial response                                            | resection                                      | ≈ 6 months                            | NED                                                                      |
| 17.                                                   | Davis 2015 [13]           | 2, M                                 | maxilla<br>1,5x1                 | ND                      | biopsy → R0 resection<br>→ 1 <sup>st</sup> recurrence                                                                                                                                 | vincristine, cyclophosphamide,<br>doxorubicin <sup>xvi</sup>                                                     | progression                                                 | R0 resection                                   | ≈ 2,5 years                           | NED                                                                      |
| 18.                                                   | current study, patient 1  | 2, F                                 | maxilla<br>2,3x2,2x1,8           | no                      | R2 resection → 1 <sup>st</sup> recurrence                                                                                                                                             | cyclophosphamide, vincristine,<br>doxorubicin, etoposide, carboplatin,<br>ifosfamide <sup>xvii</sup><br>5 months | partial response                                            | R0 resection                                   | 5,5 years                             | NED                                                                      |
| 19.                                                   | current study, patient 2* | 6, F                                 | maxilla<br>ND                    | no                      | R2 resection → 1 <sup>st</sup> recurrence<br>→ R2 resection → 2 <sup>nd</sup> recurrence                                                                                              | vincristine, dactinomycin,<br>cyclophosphamide <sup>xviii</sup><br>5 months                                      | partial response                                            | R1 resection<br>→ CHT → complete response      | 6 years                               | ALL 7 mo after MNTI treatment<br>CHT, allo-HSCT → complete response, NED |
| 20.                                                   | current study, patient 4  | 4, F                                 | maxilla<br>1x1                   | no                      | R1 resection → 1 <sup>st</sup> recurrence                                                                                                                                             | vincristine, cyclophosphamide,<br>doxorubicin <sup>xix</sup><br>3 months                                         | stable disease                                              | R2 resection<br>→ stable disease               | 2 years                               | alive with stable disease                                                |

CHT = chemotherapy; DOD = died of disease; F = female; HSCT = hematopoietic stem cell transplantation; M= male; ND = no data; NED = no evidence of disease; R0 = macroscopically complete resection with microscopically negative margins; R1 = macroscopically complete resection with microscopically positive margins; R2 = macroscopically incomplete resection; RTX = radiotherapy;  
 \* = patients who underwent different types of CHT and have been included in the tables more than once

---

<sup>i</sup> 10 courses, also “various other chemotherapeutic drugs”

<sup>ii</sup> **cyclophosphamide** (100mg/m<sup>2</sup>/day), **carboplatin** (100mg/m<sup>2</sup>/day) → **cyclophosphamide** (150mg/m<sup>2</sup>/day), **etoposide** (1g/m<sup>2</sup>/day)

<sup>iii</sup> 8 courses

<sup>iv</sup> **vincristine** (0.05 mg/kg), **cyclophosphamide** (750 mg/m<sup>2</sup>; initially started in dose and then slowly increased), **doxorubicin** added after 3 months (40 mg/m<sup>2</sup>; initially started in dose and then slowly increased)

<sup>v</sup> 3 courses

<sup>vi</sup> 2 courses

<sup>vii</sup> 6 courses

<sup>viii</sup> 6 courses

<sup>ix</sup> 6 courses with a 21-day interval. 1 course: **vincristine** (1.5 mg/m<sup>2</sup>), **doxorubicin** (30 mg/m<sup>2</sup>), **cyclophosphamide** (600 mg/m<sup>2</sup>/day); 2-6 course: **cyclophosphamide** (900 mg/m<sup>2</sup>), **vincristine** (1.5 mg/m<sup>2</sup>), **carboplatin** (450 mg/m<sup>2</sup>)

<sup>x</sup> undefined CHT

<sup>xi</sup> 8 courses

<sup>xii</sup> **cyclophosphamide** (25 mg/kg in 5 doses) → “high-dose” **methotrexate** (690 mg/m<sup>2</sup>), **vincristine** (1.5 mg/m<sup>2</sup>)

<sup>xiii</sup> **cyclophosphamide** (100mg/m<sup>2</sup>/day), **carboplatin** (100mg/m<sup>2</sup>/day) → **cyclophosphamide** (150mg/m<sup>2</sup>/day), **etoposide** (1g/m<sup>2</sup>/day)

<sup>xiv</sup> 6 courses of VECI neuroblastoma chemotherapy protocol: **vincristine** day 1, **ifosfamide** days 1 and 2, **carboplatin** day 3, and **etoposide** day 4

<sup>xv</sup> 6 courses

<sup>xvi</sup> **vincristine** weekly, **cyclophosphamide** every other week, after 3 courses **doxorubicin** added

<sup>xvii</sup> **CADO** (cyclophosphamide, vincristine, doxorubicin) 1 course → **VP-16+Carbo** (etoposide + carboplatin) 2 courses → **I2VAdr** (ifosfamide, vincristine, doxorubicin) 1 course

→ **I2VE** (ifosfamide, vincristine, etoposide) 1 course → **CADO** (cyclophosphamide, vincristine, doxorubicin) 1 course → **VP-16+Carbo** (etoposide + carboplatin) 1 course → **CO** (vincristine, cyclophosphamide) 1 course

<sup>xviii</sup> 6 courses

<sup>xix</sup> 4 courses

1. Blank, E.; Runckel, D.N. Case Report 119. *Skeletal Radiol.* **1980**, *5*, 179–182, doi:10.1148/radiology.160.2.452.
2. Shokry, Al.; Briner, J.; Makek, M. Malignant Melanotic Neuroectodermal Tumor of Infancy: A Case Report. *Pediatr. Pathol.* **1986**, *5*, 217–223, doi:10.1007/BF00570263.
3. Atkinson Jr, G.O.; Davis, P.C.; Patrick, L.E.; Winn, K.J.; Ball, T.I.; Wyly, J.B. Melanotic neuroectodermal tumor of infancy. MR findings and a review of the literature. *Pediatr. Radiol.* **1989**, *20*, 20–22.
4. Pierre-Kahn, A.; Cinalli, G.; Lellouch-Tubiana, A.; Villarejo, F.J.; Sainte-Rose, C.; Pfister, A.; Couly, G. Melanotic Neuroectodermal Tumor of the Skull and Meninges in Infancy. *Pediatr. Neurosurg.* **1992**, *18*, 6–15.
5. Shaia, W.T.; DiNardo, L.J.; Underhill, T.E.; Cesca, C.E. Recurrent melanotic neuroectodermal tumor of infancy. *Am. J. Otolaryngol.* **2002**, *23*, 249–252, doi:10.1053/ajot.2002.123463.
6. Kumari, T.P.; Venugopal, M.; Mathews, A.; Kusumakumary, P. Effectiveness of chemotherapy in melanotic neuroectodermal tumor of infancy. *Pediatr. Hematol. Oncol.* **2005**, *22*, 199–206, doi:10.1080/08880010590921450.
7. Haque, S.; McCarville, M.B.; Sebire, N.; McHugh, K. Melanotic neuroectodermal tumour of infancy: CT and MR findings. *Pediatr. Radiol.* **2012**, *42*, 699–705, doi:10.1007/s00247-011-2339-1.
8. Rickart, A.J.; Drummond-Hay, V.; Suchak, A.; Sadiq, Z.; Sebire, N.J.; Slater, O.; Mills, C. Melanotic neuroectodermal tumour of infancy: Refining the surgical approach. *Int. J. Oral Maxillofac. Surg.* **2019**, *48*, 1307–1312, doi:10.1016/j.ijom.2019.02.011.
9. Pereira, A.A.C.; de Jesus Rozante, M.M.; Bauer Doveinis, R.; Porcelli Salvarani, C.; Hissa Anegawa, T.; da Costa Souza, P.; Brat, D.J.; de Oliveira Borges, A.C. The recurrence of the melanotic neuroectodermal tumour of infancy: an unusual presentation of a rare tumour. *Ecancermedicalscience* **2020**, *14*, doi:10.3332/ecancer.2020.1049.
10. Dehner, L.P.; Sibley, R.K.; Sauk, J.J.; Vickers, R.A.; Nesbit, M.E.; Leonard, A.S.; Waite, D.E.; Neeley, J.E.; Ophoven, J. Malignant Melanotic Neuroectodermal Tumor of Infancy. A Clinical, Pathologic, Ultrastructural and Tissue Culture Study. *Cancer* **1979**, *43*, 1389–1410.
11. Neven, J.; Hulsbergen-van der Kaa, C.; Groot-Loonen, J.; de Wilde, P.C.M.; Merks, M.A.W. Recurrent melanotic neuroectodermal tumor of infancy: a proposal for treatment protocol with surgery and adjuvant chemotherapy. *Oral Surgery, Oral Med. Oral Pathol. Oral Radiol. Endod.* **2008**, *106*, 493–496, doi:10.1016/j.tripleo.2008.02.001.
12. Enriquez, A.M.; Carnate Jr, J.M. Melanotic neuroectodermal tumor of infancy. *Philipp. J. Otolaryngol. Neck Surg.* **2011**, *26*, 51–54, doi:10.5858/arpa.2018-0241-RA.
13. Davis, J.M.; DeBenedictis, M.; Frank, D.K.; Lessin, M.E. Melanotic Neuroectodermal Tumor of Infancy: A Wolf in Sheep's Clothing. *Ann. Otol. Rhinol.*

*Laryngol.* **2015**, 124, 97–101, doi:10.1177/0003489414543070.
