# Supplementary material for: The Role of Chemotherapy in Management of Inoperable, Metastatic and/or Recurrent Melanotic Neuroectodermal Tumor of Infancy—Own Experience and Systematic Review
Source: MDPI journal article supplement (doi:10.3390/cancers13153872), 2021-07-31
Supplement: s1 [file s1]

**Systematic Review: The role of chemotherapy in management of inoperable, metastatic and/or recurrent melanotic neuroectodermal tumor of infancy – own experience and systematic review.**

**Date of the literature search: 26.04.2021**

## **SYSTEMATIC LITERATURE SEARCH**

### **1. PUBMed/Medline database:**

|                                    |     |                    |
|------------------------------------|-----|--------------------|
| melanotic neuroectodermal tumor OR | AND | chemotherapy OR    |
| retinal anlage tumor OR            |     | systemic treatment |
| melanotic progonoma                |     |                    |

| no. | search terms                                                                           | results   |
|-----|----------------------------------------------------------------------------------------|-----------|
| #1  | ((melanotic neuroectodermal tumor) OR (melanotic progonoma)) OR (retinal anlage tumor) | 492       |
| #2  | (chemotherapy) OR (systemic treatment)                                                 | 3,656,927 |
| #3  | #1 AND #2                                                                              | <b>42</b> |

### **2. SCOPUS**

|                                    |     |                    |
|------------------------------------|-----|--------------------|
| melanotic neuroectodermal tumor OR | AND | chemotherapy OR    |
| retinal anlage tumor OR            |     | systemic treatment |
| melanotic progonoma                |     |                    |

| no. | search terms                                                                                 | results    |
|-----|----------------------------------------------------------------------------------------------|------------|
| #1  | ((“melanotic neuroectodermal tumor”) OR (“melanotic progonoma”)) OR (“retinal anlage tumor”) | 885        |
| #2  | (chemotherapy) OR (“systemic treatment”)                                                     | 2,141,128  |
| #3  | #1 AND #2                                                                                    | <b>209</b> |

### **3. Web of Science**

|                                    |     |                    |
|------------------------------------|-----|--------------------|
| melanotic neuroectodermal tumor OR | AND | chemotherapy OR    |
| retinal anlage tumor OR            |     | systemic treatment |
| melanotic progonoma                |     |                    |

| no. | search terms | results |
|-----|--------------|---------|
|-----|--------------|---------|

|    |                                                                                                  |           |
|----|--------------------------------------------------------------------------------------------------|-----------|
| #1 | ALL="melanotic neuroectodermal tumor" OR ALL="retinal anlage tumor" OR ALL="melanotic progonoma" | 329       |
| #2 | ALL=chemotherapy OR ALL="systemic treatment"                                                     | 583,815   |
| #3 | #1 AND #2                                                                                        | <b>40</b> |

**42 + 209 + 40 = 291 papers**

**After automatic (Mendeley) removal of duplicates: 227 papers**

**After manual removal of duplicates: 215 papers**

**After abstract reading: 90 papers**

Reports not retrieved: (n=1)

No use of chemotherapy in MNTI reported (n = 57)

Unclear histology (n = 3)

No information on cytostatic drugs used (n = 1)

No information on the response to chemotherapy (n = 2)

Concomitant use of radiotherapy (n=1)

**After full-text reading: 25 papers**

## **ADDITIONAL CITATION SEARCH**

**Publications found in the references of other manuscripts (n=12)**

Duplicated case (n = 1)

Unclear histology (n = 1)

No information on cytostatic drugs used (n = 2)

**After full-text reading: 8 papers**

## **ALL STUDIES INCLUDED IN REVIEW:**

All studies found via systematic search and via reference review (n = 33) with (n = 43) individual patients (n=5 excluded due to missing data/duplication).

Additional patients from authors' institutions (n = 4)

**Individual patients included in review: 42 patients**
